# Supplementary material for: Synthesis of Li 7 P 3 S 11 solid electrolyte in ethyl propionate medium for all-solid-state Li-ion battery
Source: Royal Society of Chemistry journal article supplement (doi:10.1039/d5ra05281e), 2025-01-01
Supplement: d5ra05281e1.pdf [file d5ra05281e1.pdf]

*Supporting Information*

**Synthesis of  $\text{Li}_7\text{P}_3\text{S}_{11}$  Solid Electrolyte in Ethyl Propionate Medium for All-Solid-State Li-ion Battery**

Tran Anh Tu<sup>1,2,3</sup> and Nguyen Huu Huy Phuc<sup>1,2,3\*</sup>

<sup>1</sup>Faculty of Materials Technology, Ho Chi Minh City University of Technology (HCMUT), 268 Ly Thuong Kiet Str., Dist. 10, Ho Chi Minh City, Vietnam

<sup>2</sup>National Key Laboratory of Polymer and Composite Materials, Ho Chi Minh City, 268 Ly Thuong Kiet, District 10, Ho Chi Minh City, Vietnam

<sup>3</sup>Vietnam National University Ho Chi Minh City, Linh Trung Ward, Thu Duc Dist., Ho Chi Minh City, Vietnam

\*Corresponding author: nhphuc@hcmut.edu.vn (NHH. Phuc)

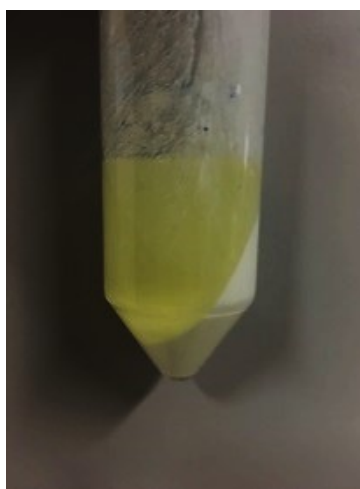

Figure S1: Digital photograph of the as-prepared suspension after centrifugation for 5 min at 4000 rpm.

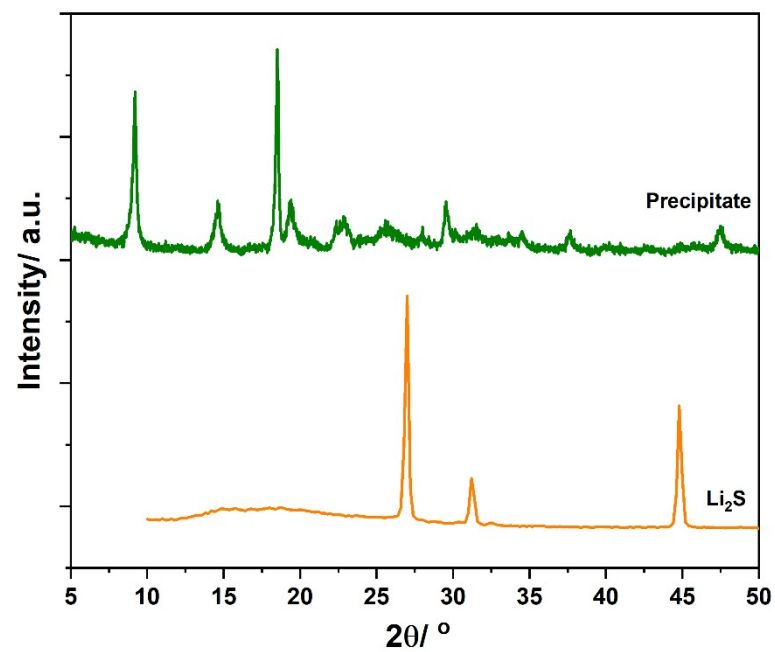

Figure S2: XRD patterns of the precipitate obtained after decanting the yellow supernatant shown in Figure S1 and Li<sub>2</sub>S.

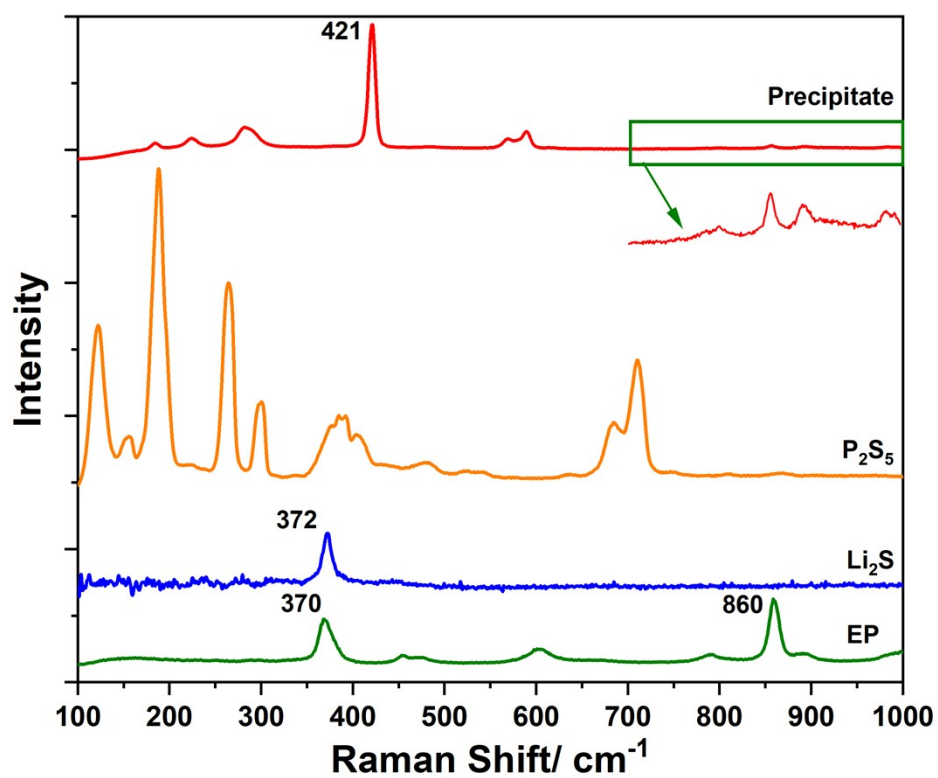

Figure S3: Raman spectrum of the precipitate obtained after decanting the yellow supernatant showing in Figure S1; the spectra of EP, Li<sub>2</sub>S and P<sub>2</sub>S<sub>5</sub> were included for comparison. The inset showed the enlargement of the spectrum of white precipitate.
